# Supplementary material for: Pyrazole-, isoxazole- and pyrrole-ring fused derivatives of C60: synthesis and electrochemical properties as well as morphological characterization
Source: Royal Society of Chemistry journal article supplement (doi:10.1039/d2nj00421f), 2022-01-01
Supplement: d2nj00421f1.pdf [file d2nj00421f1.pdf]

*Electronic Supplementary Information for*

# Pyrazole-, Isoxazole- and Pyrrole-ring Fused Derivatives of C<sub>60</sub>: Synthesis and electrochemical properties as well as morphological characterization

Mohammad H. BinSabt<sup>a</sup>, Abdulrahman Alazemi<sup>\*a</sup>, Hamad M. Al-Matar<sup>a</sup>, Alan L. Balch<sup>b</sup>, and  
Mona A. Shalaby<sup>a</sup>

<sup>a</sup> Chemistry Department, Faculty of Science, University of Kuwait, P.O. Box 5969, Safat  
13060, Kuwait

<sup>b</sup> Department of Chemistry, University of California at Davis, One Shields Avenue,  
Davis, California 95616, United States

<sup>a</sup> \*Corresponding author. E-mail address: a.alazmi@ku.edu.kw

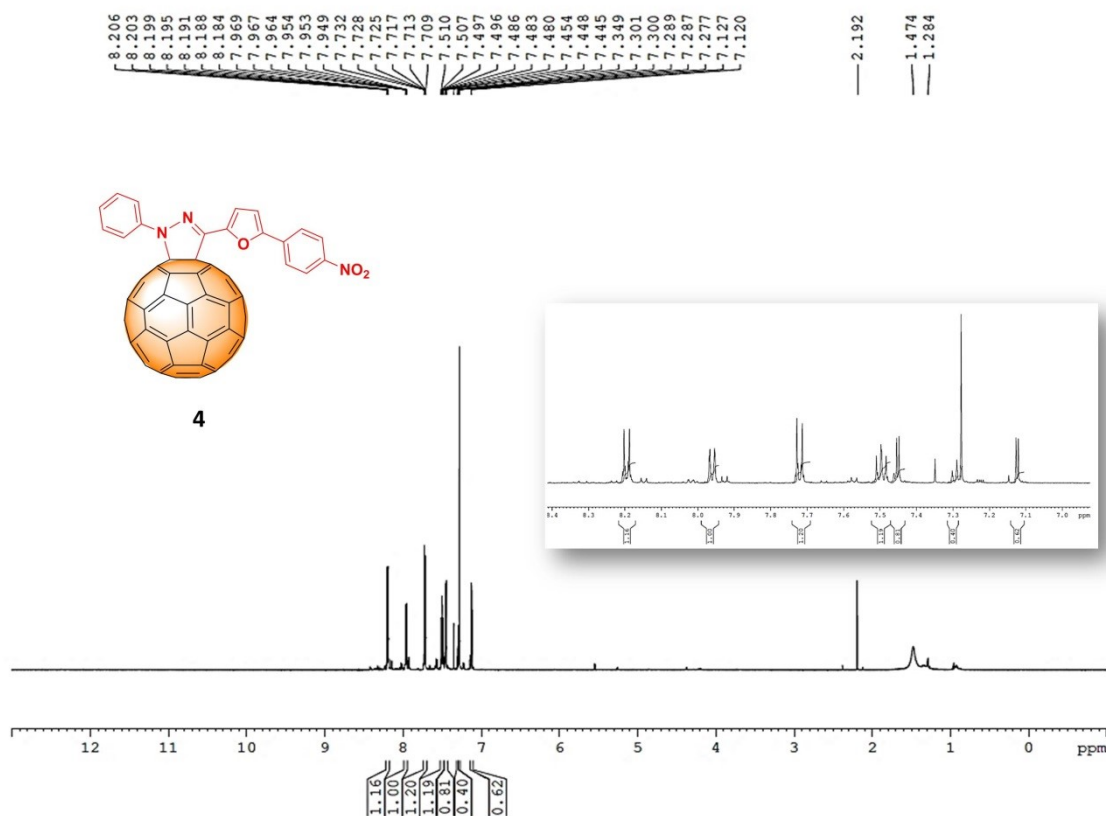

**Figure S1.** The <sup>1</sup>H NMR spectrum of compound 4 (600.13 MHz, solvent CDCl<sub>3</sub>)

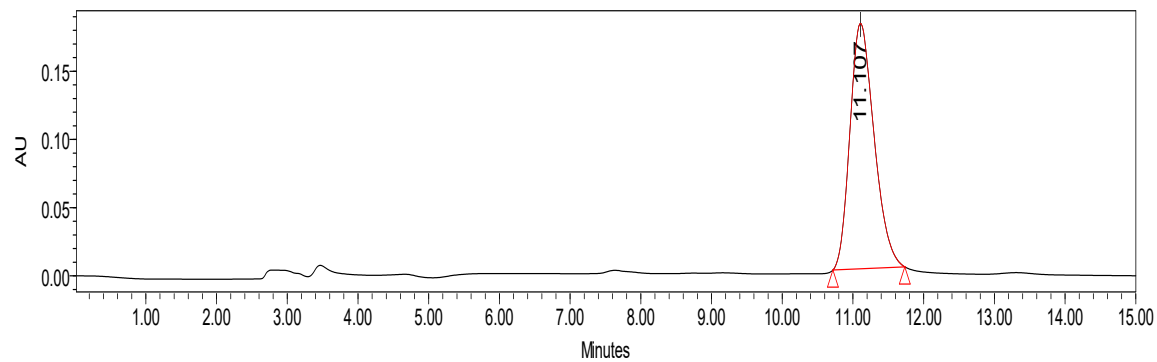

|   | Retention Time | Area    | % Area | Height | % Height |
|---|----------------|---------|--------|--------|----------|
| 1 | 11.107         | 4275772 | 100.00 | 180203 | 100.00   |

**Figure S2.** HPLC chromatogram of compound **4**

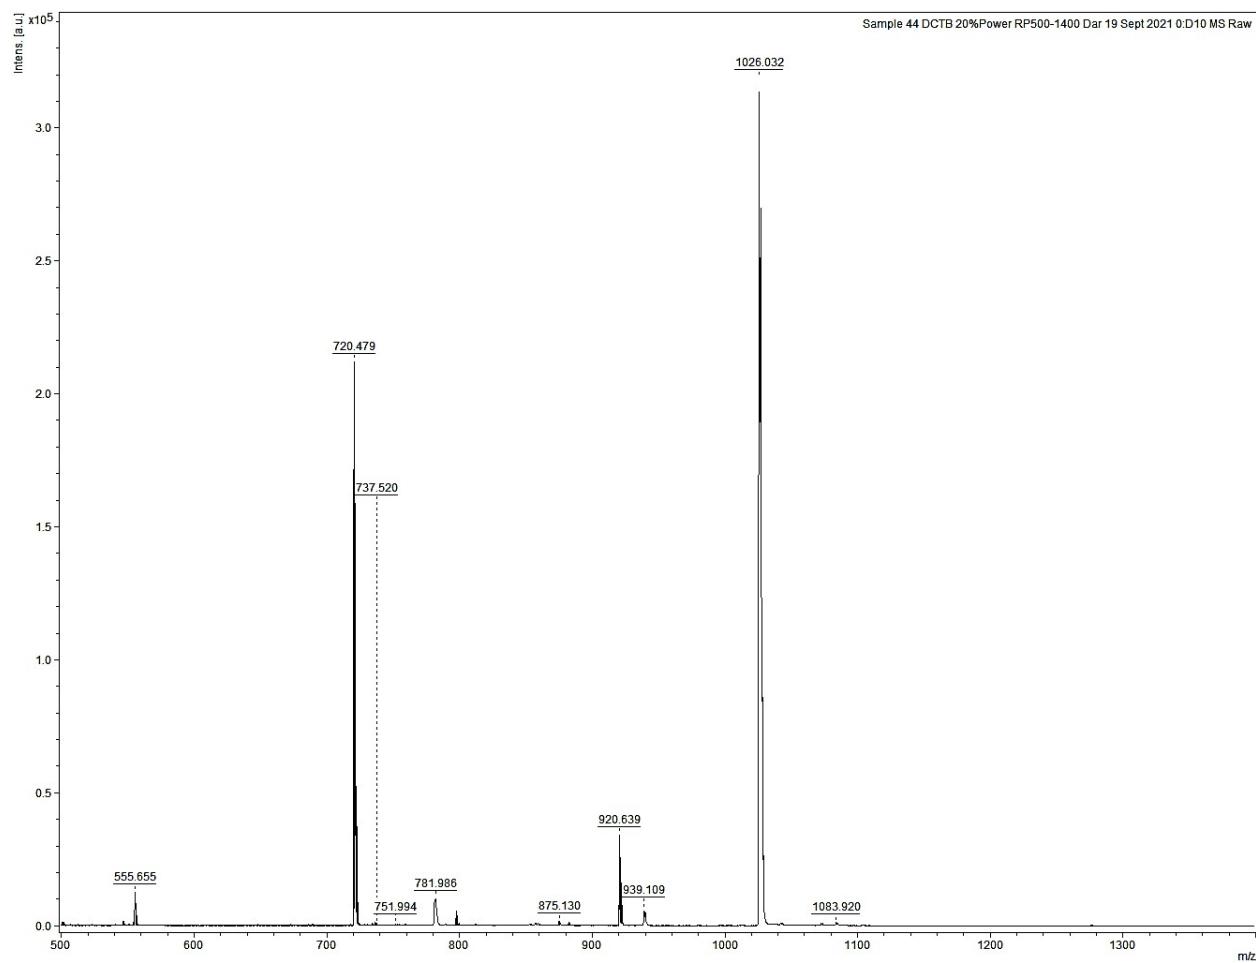

**Figure S3.** HRMS (ESI-TOF) of compound **4**

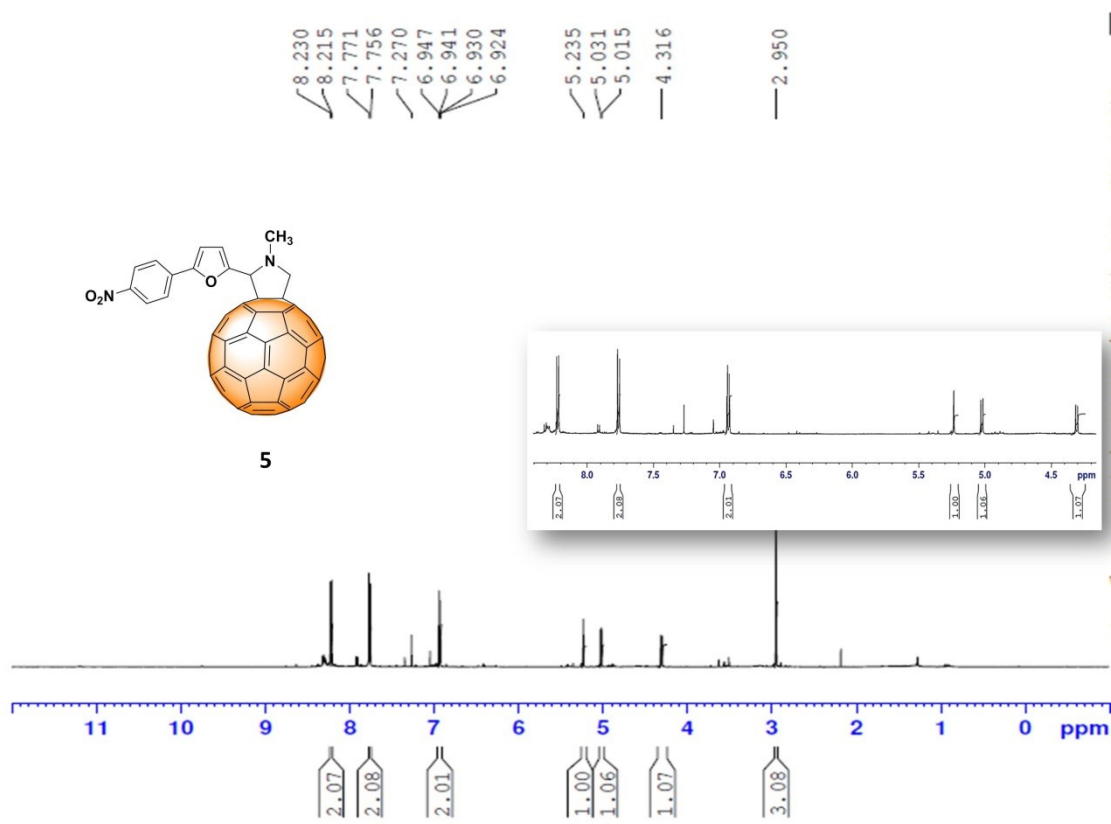

**Figure S4.** The <sup>1</sup>H NMR spectrum of compound **5** (600.13 MHz, solvent CDCl<sub>3</sub>)

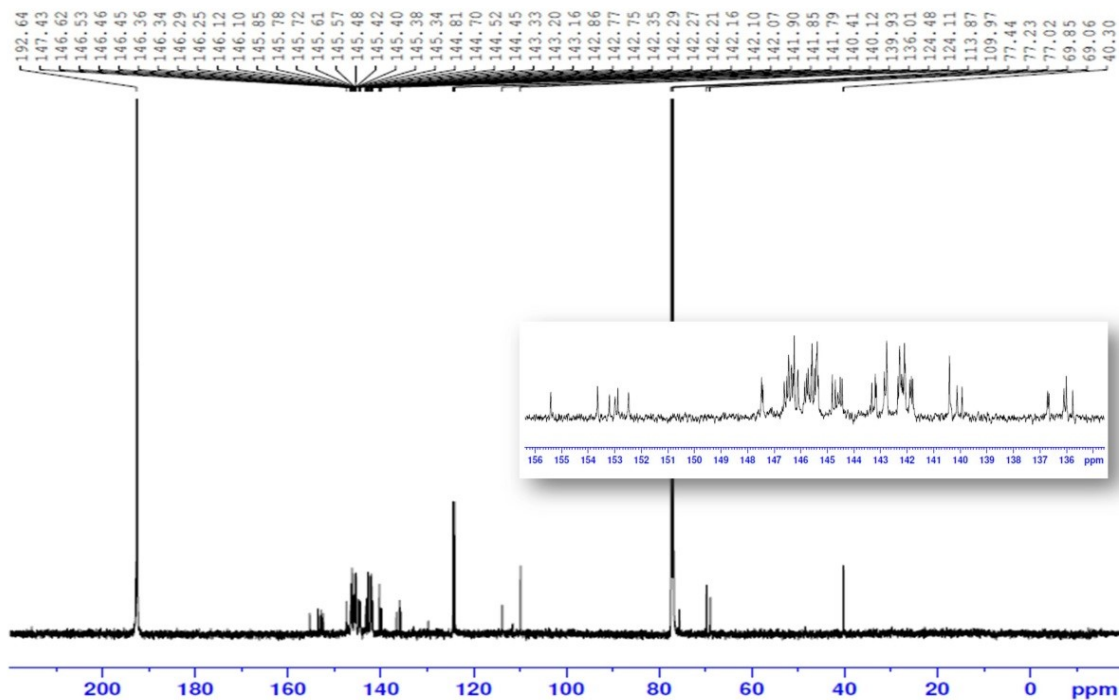

**Figure S5.** The <sup>13</sup>C NMR spectrum of compound **5** (150 MHz, solvent CS<sub>2</sub> : CDCl<sub>3</sub> = 3:1)

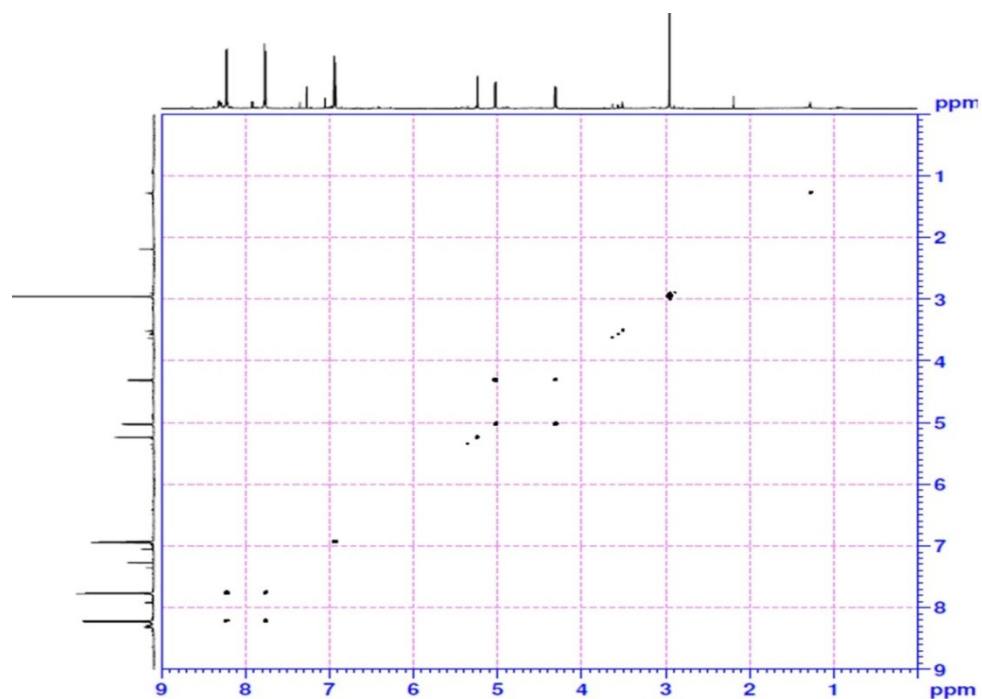

**Figure S6.** H-H COSY NMR spectrum of compound **5** (600.13 MHz, solvent  $\text{CDCl}_3$ )

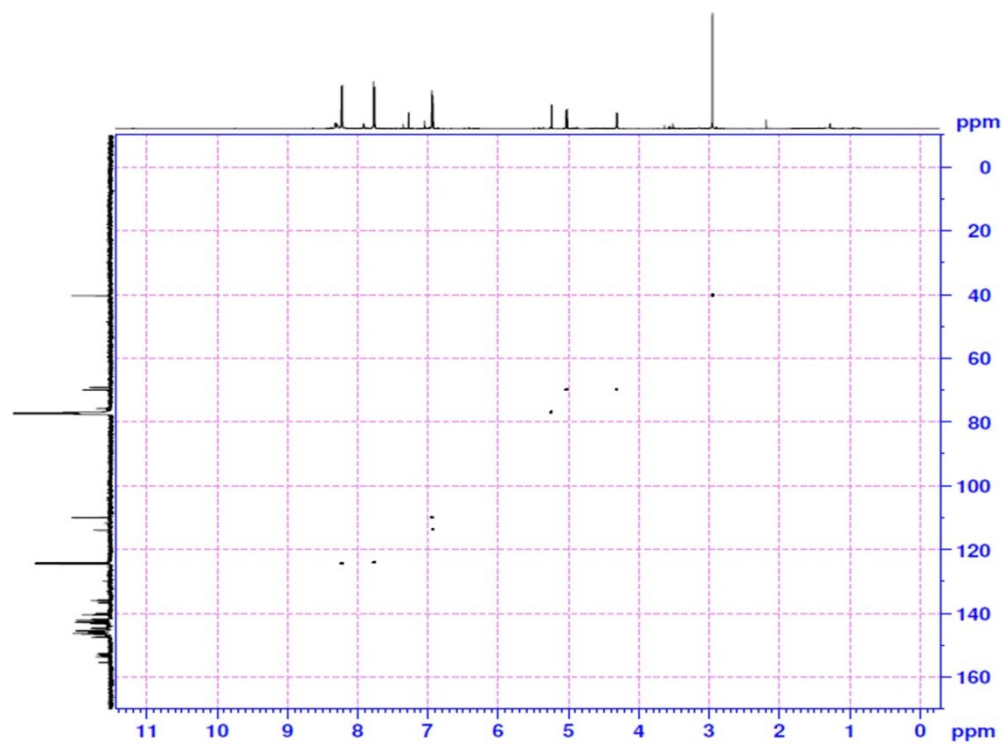

**Figure S7.** The HSQC spectrum of compound **5** (600.13 MHz for  $^1\text{H}$  and  $^{13}\text{C}$ , solvent  $\text{CS}_2 : \text{CDCl}_3 = 3:1$ )

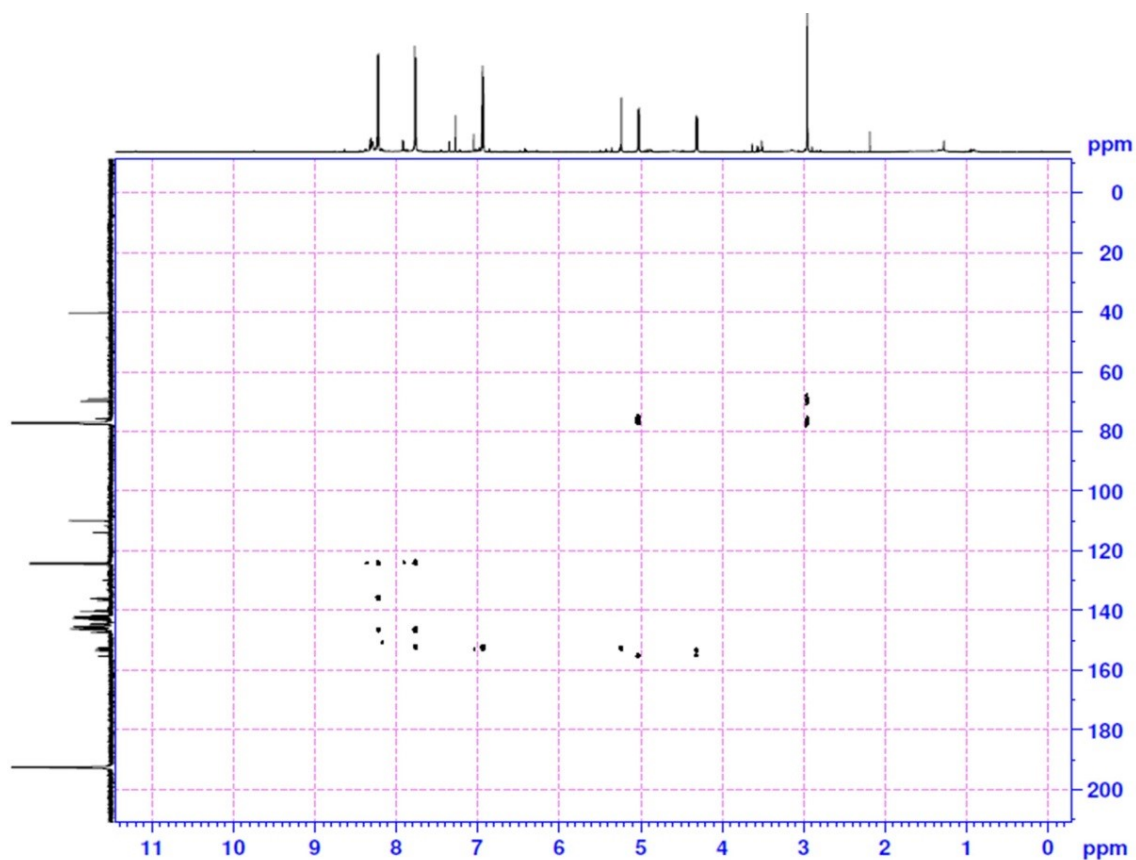

**Figure S8.** The HMBC spectrum of compound **5** (600.13 MHz for  $^1\text{H}$  and  $^{13}\text{C}$ , solvent  $\text{CS}_2$  :  $\text{CDCl}_3 = 3:1$ )

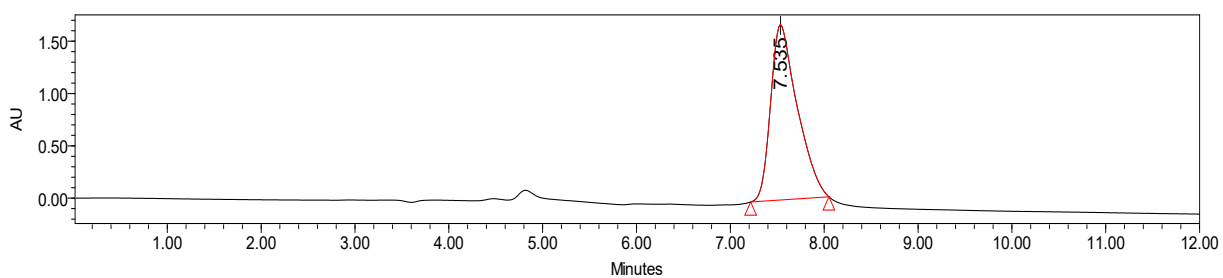

|   | Retention Time | Area     | % Area | Height  | % Height |
|---|----------------|----------|--------|---------|----------|
| 1 | 7.535          | 32994205 | 100.00 | 1677954 | 100.00   |

**Figure S9.** HPLC chromatogram of compound **5**

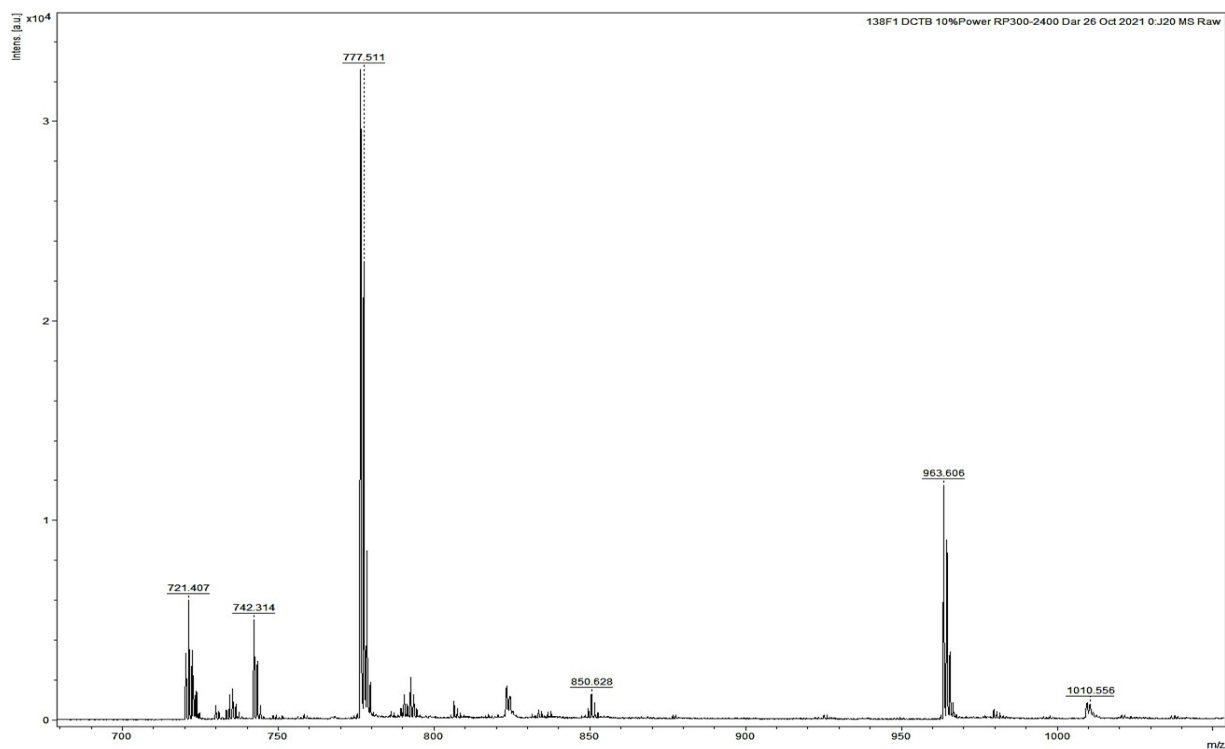

**Figure S10.** MALDI-TOF spectrum of compound **5**

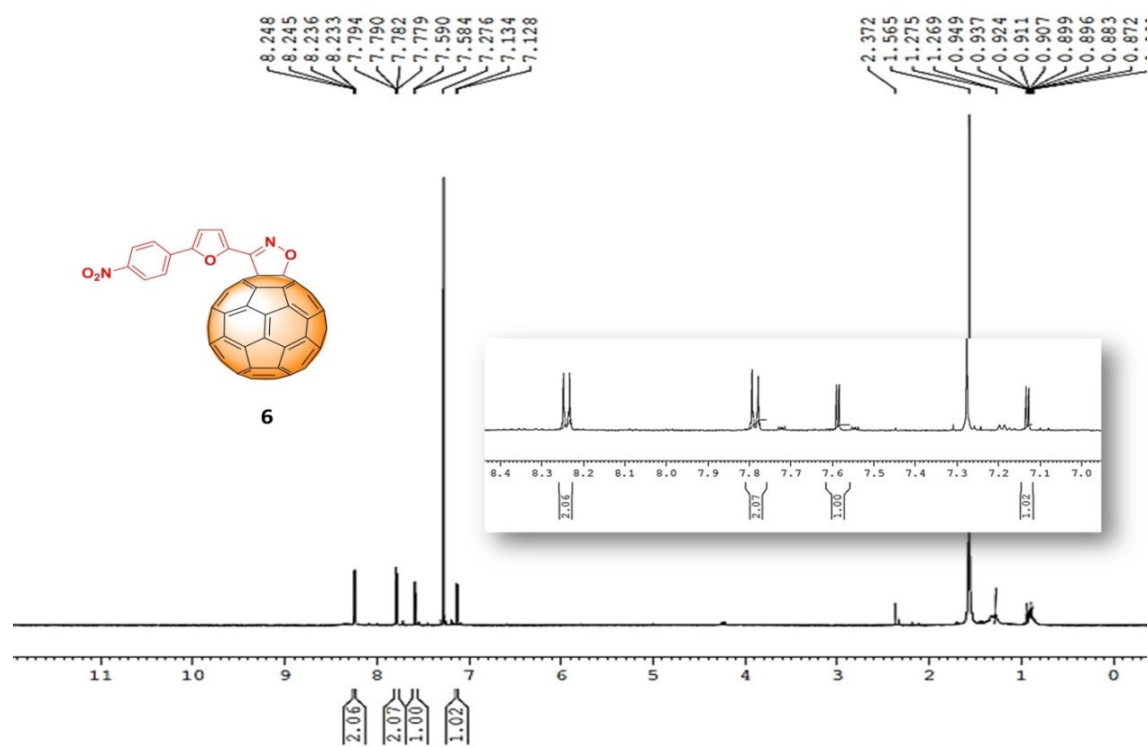

**Figure S11.** The <sup>1</sup>H NMR spectrum of compound **6** (600.13 MHz, solvent CDCl<sub>3</sub>)

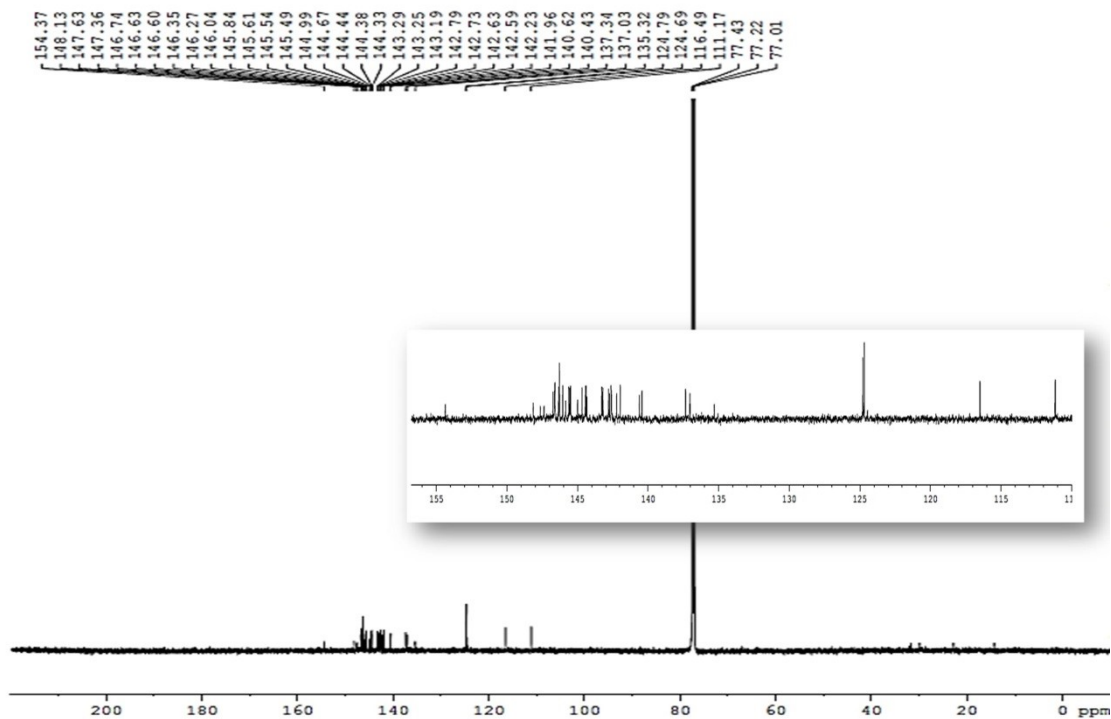

**Figure S12.** The  $^{13}\text{C}$  NMR spectrum of compound **6** (150 MHz, solvent  $\text{CS}_2 : \text{CDCl}_3 = 3:1$ )

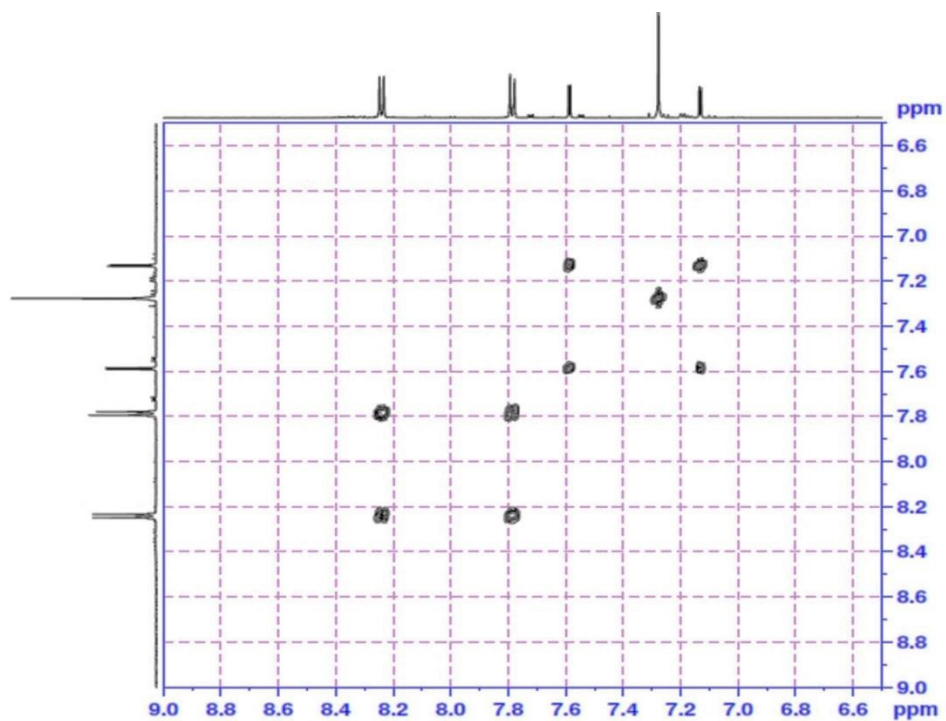

**Figure S13.** H-H COSY NMR spectrum of compound **6** (600.13 MHz, solvent  $\text{CDCl}_3$ )



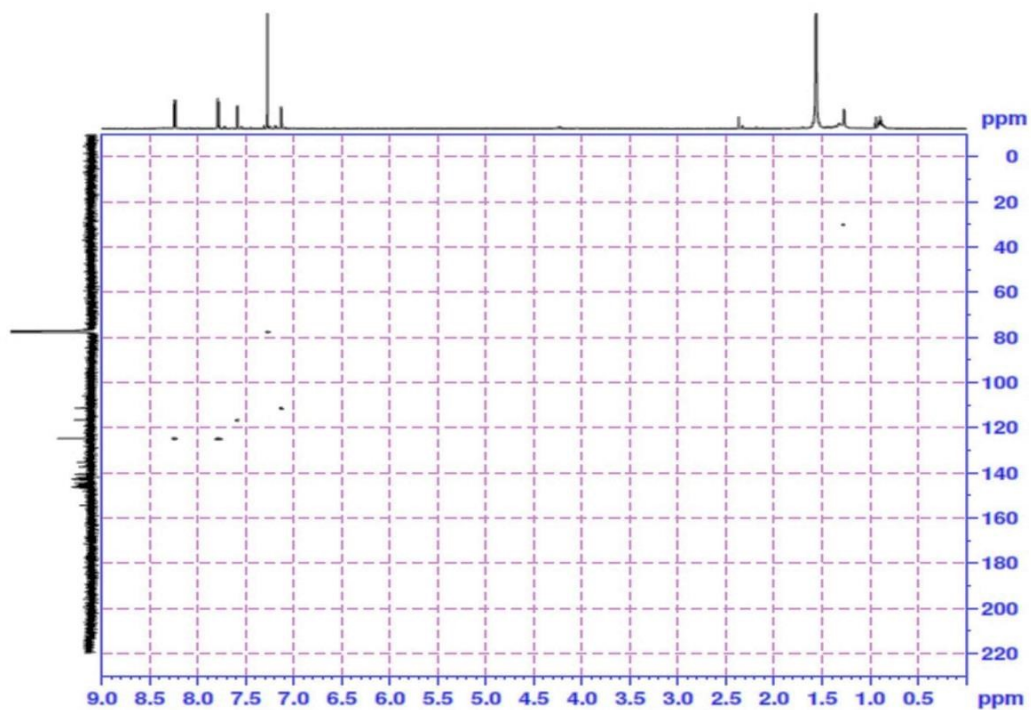

**Figure S14.** The HSQC spectrum of compound **6** (600.13 MHz for  $^1\text{H}$  and  $^{13}\text{C}$ , solvent  $\text{CS}_2$  :  $\text{CDCl}_3 = 3:1$ )

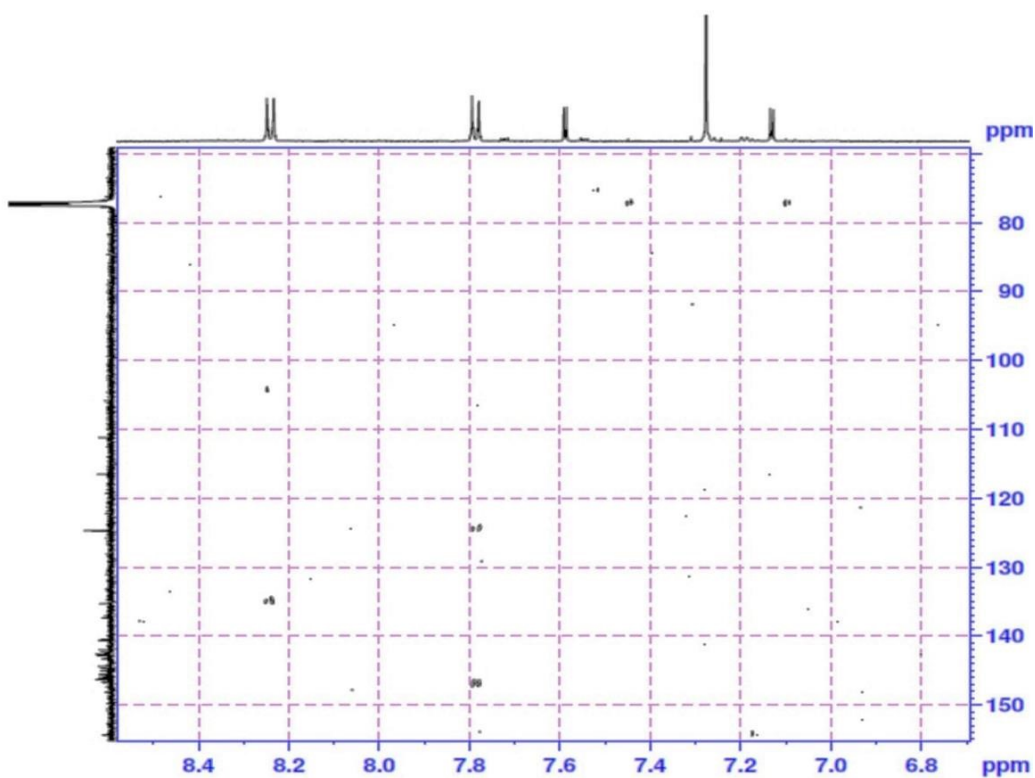

**Figure S15.** The HMBC spectrum of compound **6** (600.13 MHz for  $^1\text{H}$  and  $^{13}\text{C}$ , solvent  $\text{CS}_2$  :  $\text{CDCl}_3 = 3:1$ )



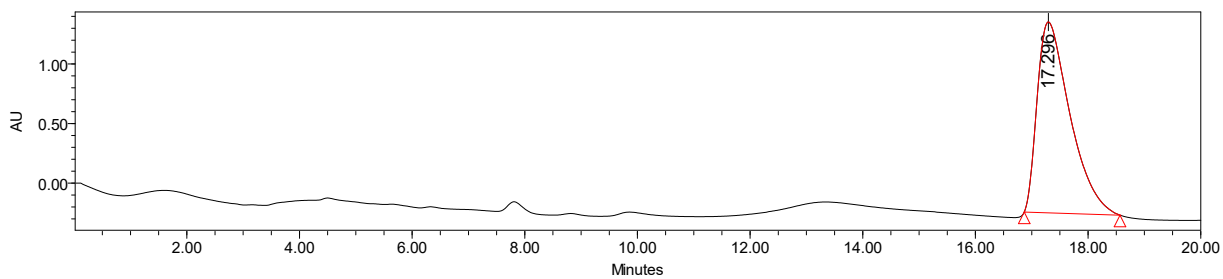

|   | Retention Time | Area     | % Area | Height  | % Height |
|---|----------------|----------|--------|---------|----------|
| 1 | 17.296         | 64839343 | 100.00 | 1603222 | 100.00   |

**Figure S16.** HPLC chromatogram of compound **6**

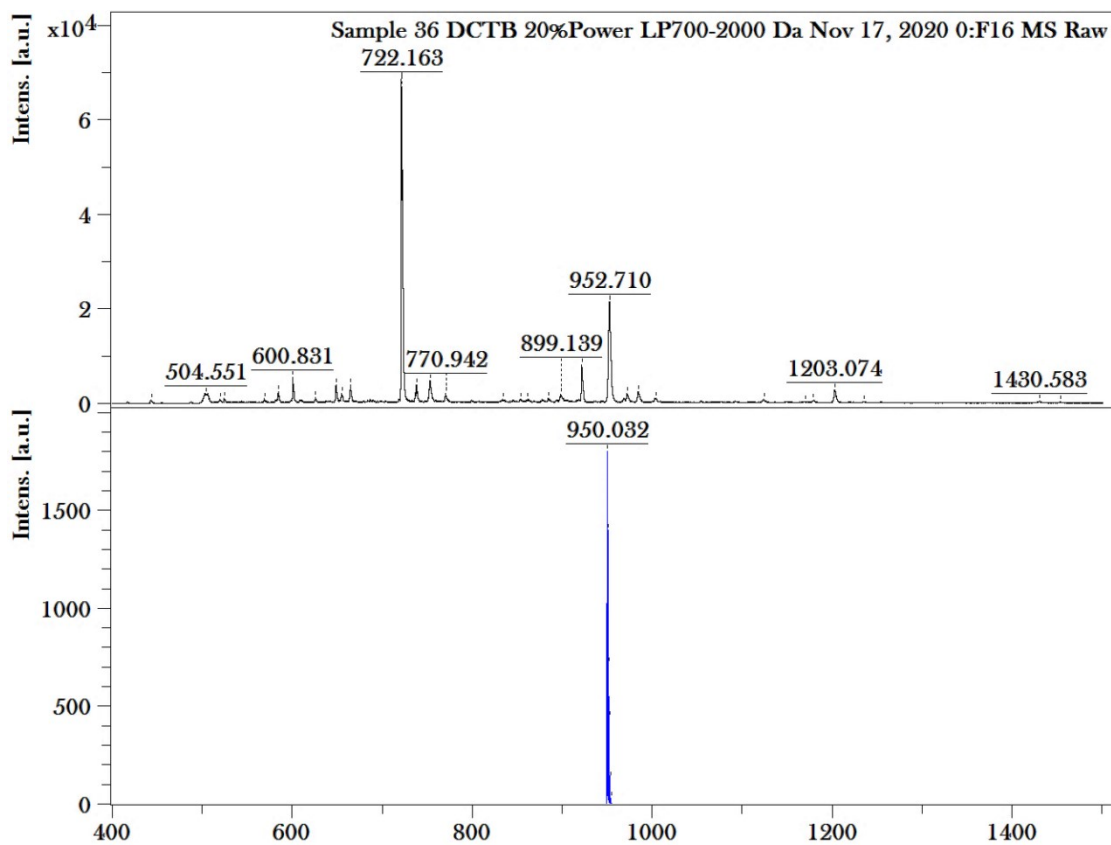

**Figure S17.** MALDI-TOF spectrum of compound **6**

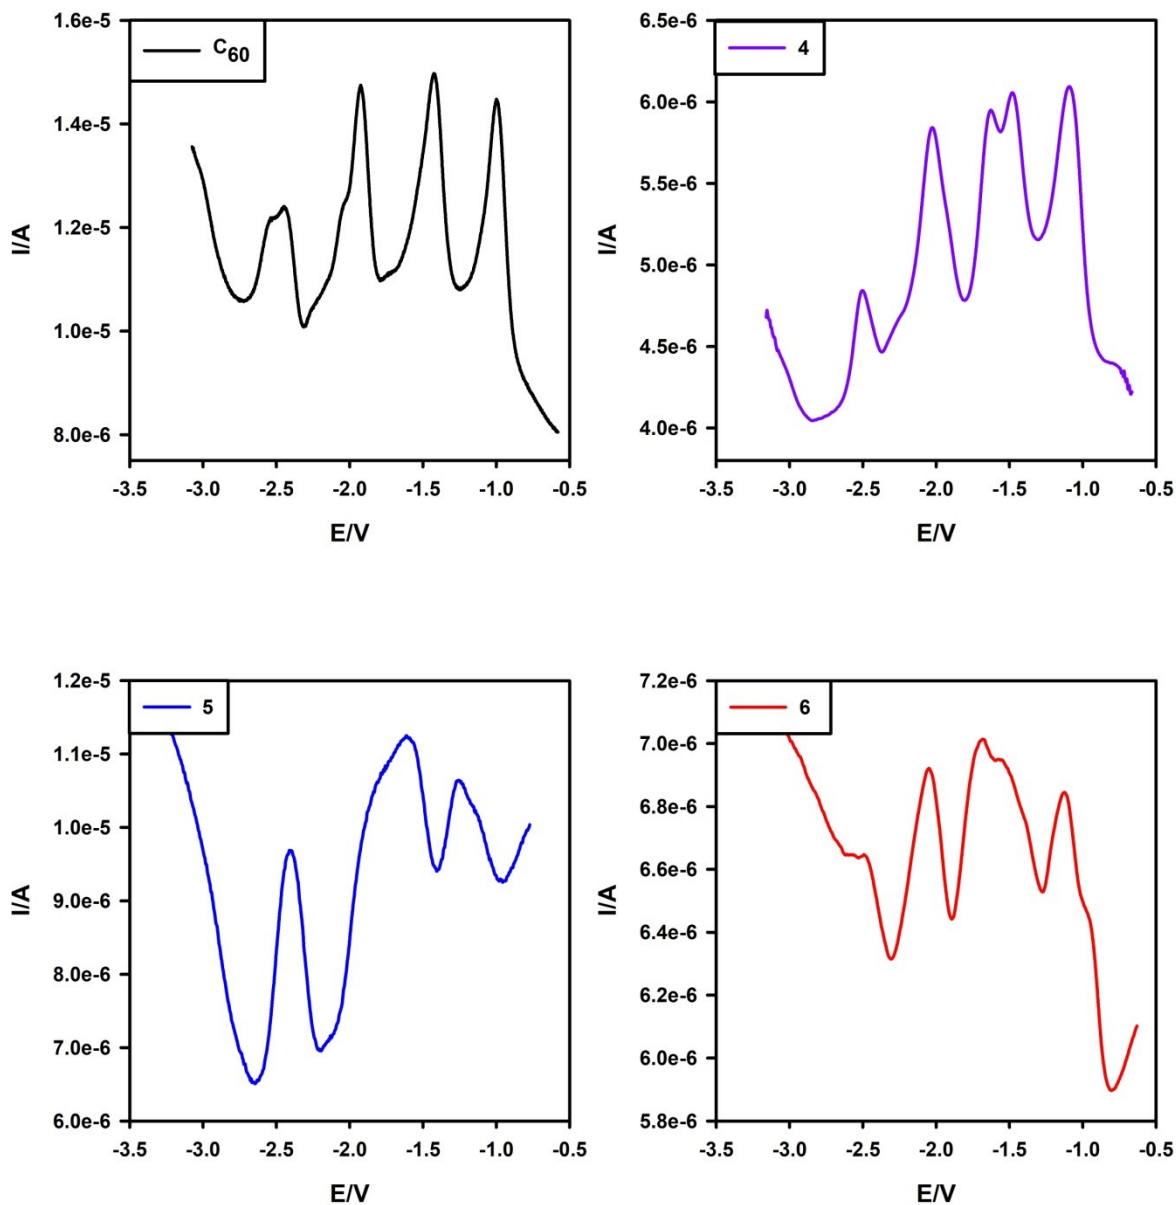

**Figure S18.** Square wave voltammograms of  $C_{60}$ ,  $FPzC_{60}$  (4),  $FPyC_{60}$  (5), and  $FOxC_{60}$  (6) in toluene/ $CH_3CN$  (4:1) solutions with 0.1 M TBAP; V vs.  $Fc/Fc^+$ ; scan rate was  $100 \text{ mVs}^{-1}$ .

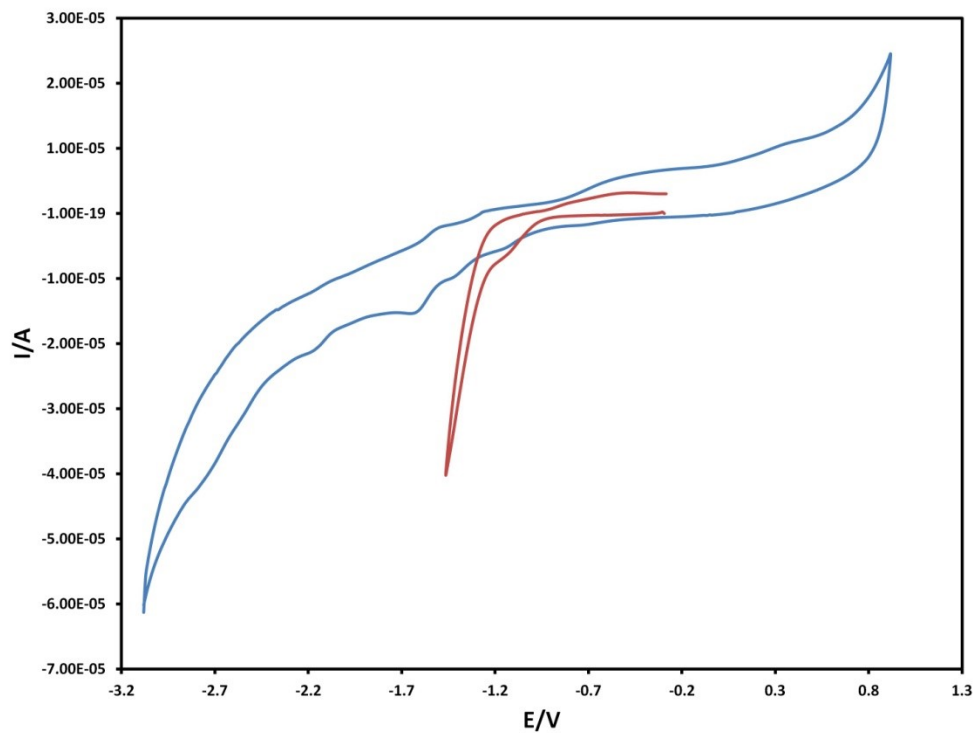

**Figure S19.** Cyclic voltammogram of compound **5** with the first reduction peak.

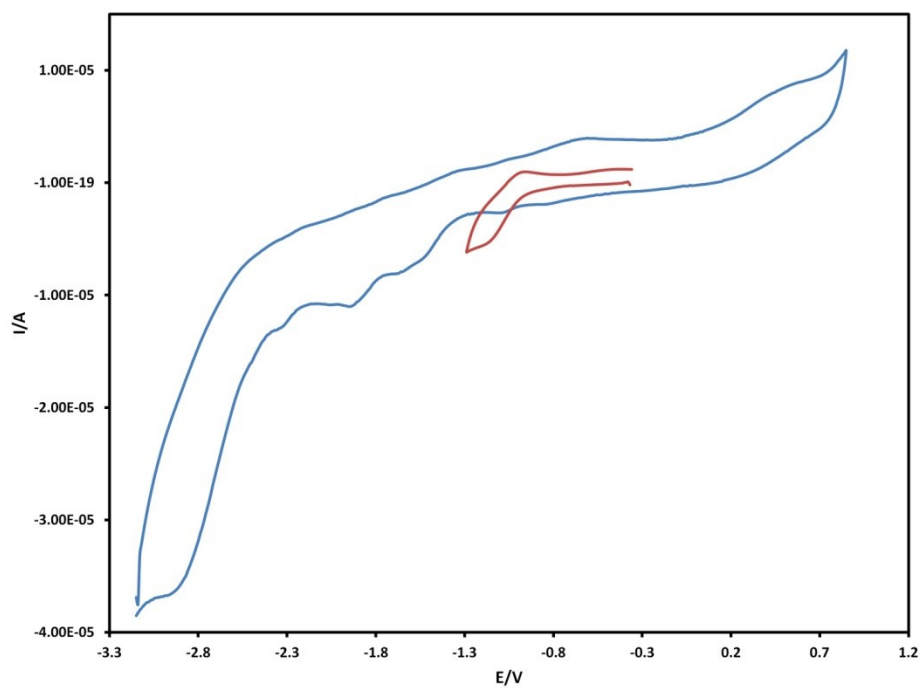

**Figure S20.** Cyclic voltammogram of compound **6** with the first reduction peak.
